# Supplementary material
Source: publisher figshare collection journal article supplement (https://frontiersin.figshare.com/ndownloader/files/23425880)

**Supplementary Figure 2.** Straw yield at 50% recommended dose of fertilizer (RDF). Finger millet (dark shaded bars) and pigeon pea (light shaded bars) straw yield at 50% RDF at Bangalore and Kolli Hills. Significant differences among means were calculated crop wise. Each error bar indicates +1 standard deviation of the mean. Alpha ( $\alpha$ ) and beta ( $\beta$ ) above the bars indicate letters of significance for combined yields finger millet and pigeon pea. Values not sharing the same letters are significantly different at  $p < 0.05$ .

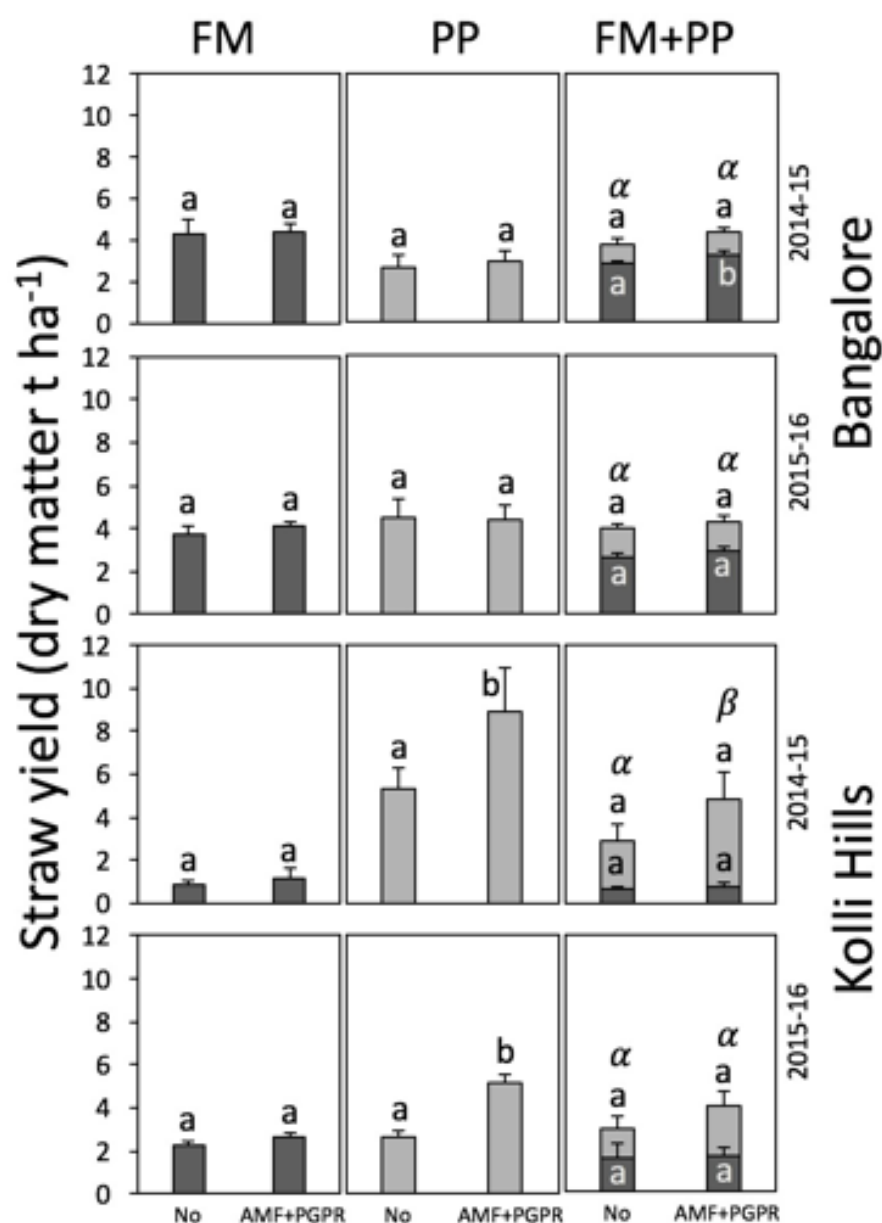

Supplement: Supplementary file 1 [file 23425880]
